# Supplementary material for: Chronic Intermittent Hypoxia Regulates CaMKII‐Dependent MAPK Signaling to Promote the Initiation of Abdominal Aortic Aneurysm
Source: Hindawi journal article supplement (doi:10.1155/2021/2502324), 2021-01-01
Supplement: f1 [file 2502324.f1.pdf]

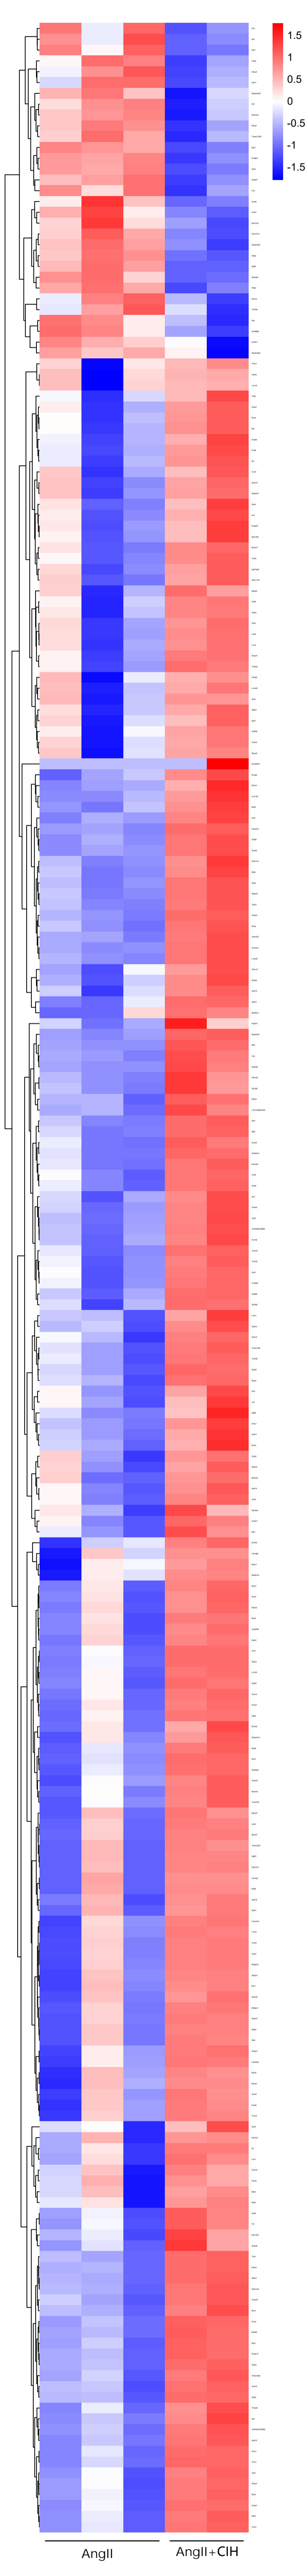

AngII

AngII+CIH
